# Supplementary material for: Conformational change of all-trans-1,6-diphenyl-1,3,5-hexatriene in two crystalline forms
Source: Royal Society of Chemistry journal article supplement (doi:10.1039/b811220g), 2008-01-01
Supplement: b811220g.pdf [file b811220g.pdf]

**Table S1** Crystal data and structure refinement for compound **1** in orthorhombic form at room temperature after heating

|                                                                 |                                 |
|-----------------------------------------------------------------|---------------------------------|
| Chemical formula                                                | C <sub>18</sub> H <sub>16</sub> |
| Formula weight                                                  | 232.31                          |
| Crystal system                                                  | Orthorhombic                    |
| Space group                                                     | <i>Pbca</i>                     |
| Temperature/K                                                   | Room temperature                |
| <i>a</i> /Å                                                     | 7.7439(5)                       |
| <i>b</i> /Å                                                     | 9.8691(7)                       |
| <i>c</i> /Å                                                     | 18.1365(12)                     |
| $\alpha^\circ$                                                  | 90.0                            |
| $\beta^\circ$                                                   | 90.0                            |
| $\gamma^\circ$                                                  | 90.0                            |
| <i>V</i> /Å <sup>3</sup>                                        | 1386.09(16)                     |
| <i>Z</i>                                                        | 4                               |
| Reflections collected                                           | 19949                           |
| Independent reflections                                         | 2022                            |
| <i>R</i> <sub>int</sub>                                         | 0.0256                          |
| Data/parameters                                                 | 2022/115                        |
| Goodness-of-fit on <i>F</i> <sup>2</sup>                        | 0.994                           |
| <i>R</i> [ <i>F</i> <sup>2</sup> > 2σ( <i>F</i> <sup>2</sup> )] | 0.0398                          |
| <i>wR</i> ( <i>F</i> <sup>2</sup> ) (all data)                  | 0.1130                          |
| $\rho_{\text{min}}$ (e Å <sup>-3</sup> )                        | 0.107                           |
| $\rho_{\text{max}}$ (e Å <sup>-3</sup> )                        | -0.100                          |

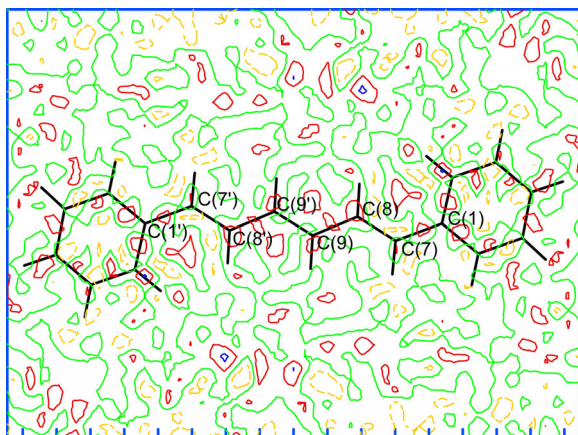

**Fig. S1** A difference electron density map of orthorhombic crystal of *all-trans*-1,6-diphenyl-1,3,5-hexatriene (**1**) at room temperature after heating.

The section of the map is the least-squares mean plane of eight central carbon atoms (C(1), C(7), C(8), C(9), C(9'), C(8'), C(7') and C(1')). The contour lines are at 0.05 e<sup>-3</sup> intervals. Negative contours are indicated by

10 broken lines.
